# Supplementary material for: Alloy nanocluster artificial photosystems steering photoredox organic transformation
Source: Royal Society of Chemistry journal article supplement (doi:10.1039/d4ta08327j), 2025-01-01
Supplement: d4ta08327j1.pdf [file d4ta08327j1.pdf]

# **Alloy Nanoclusters Artificial Photosystems Steering Photoredox Organic Transformation**

Bing-Xiong Zheng<sup>a</sup>, Jiao-Nan Yuan<sup>a</sup>, Peng Su<sup>a</sup>, Xian Yan<sup>a</sup>, Qing Chen<sup>a</sup>, Meng Yuan<sup>a</sup>, Fang-Xing Xiao<sup>a, b\*</sup>

a. College of Materials Science and Engineering, Fuzhou University, New Campus, Minhou, Fujian  
Province, 350108, China.

b. State Key Laboratory of Structural Chemistry, Fujian Institute of Research on the Structure of Matter,  
Chinese Academy of Sciences, Fuzhou, Fujian 350002, PR China.

E-mail: [fxiao@fzu.edu.cn](mailto:fxiao@fzu.edu.cn)

# Table of Contents

|                                                                                                                                                            | Page NO. |
|------------------------------------------------------------------------------------------------------------------------------------------------------------|----------|
| <b>Experimental Section</b> .....                                                                                                                          | S3       |
| <b>Figure S1</b> Characterization of Au <sub>1-x</sub> Ag <sub>x</sub> @GSH NCs .....                                                                      | S4       |
| <b>Figure S2</b> Characterization of Au <sub>1-x</sub> Cu <sub>x</sub> @GSH NCs .....                                                                      | S5       |
| <b>Figure S3</b> Characterization of Au <sub>1-x</sub> Pt <sub>x</sub> @GSH NCs .....                                                                      | S6       |
| <b>Figure S4</b> images and EDS results of CdS NWs .....                                                                                                   | S7       |
| <b>Figure S5</b> EDS result of Au <sub>1-x</sub> Ag <sub>x</sub> /CdS NWs .....                                                                            | S8       |
| <b>Figure S6</b> Sample colors of different samples .....                                                                                                  | S9       |
| <b>Figure S7</b> XPS spectra of CdS NWs, CdS@MEA NWs, Au <sub>1-x</sub> Ag <sub>x</sub> /CdS NWs .....                                                     | S10      |
| <b>Figure S8</b> The characterizations of Au <sub>1-x</sub> Cu <sub>x</sub> /CdS NWs and Au <sub>1-x</sub> Pt <sub>x</sub> /CdS NWs heterostructures ..... | S11      |
| <b>Figure S9</b> Blank experiments for photocatalytic reduction of 4-NA without catalyst or light .....                                                    | S12      |
| <b>Figure S10</b> UV-vis absorption spectrum of MEA aqueous solution .....                                                                                 | S13      |
| <b>Figure S11</b> Cyclic reactions of Au <sub>1-x</sub> Ag <sub>x</sub> /CdS NWs .....                                                                     | S14      |
| <b>Figure S12</b> Photoactivities of CdS NWs, CdS@MEA NWs, Au <sub>1-x</sub> Ag <sub>x</sub> /CdS NWs toward reduction .....                               | S15      |
| <b>Figure S13</b> PEC performances of Au <sub>1-x</sub> Cu <sub>x</sub> /CdS NWs and Au <sub>1-x</sub> Pt <sub>x</sub> /CdS NWs .....                      | S16      |
| <b>Figure S14</b> M-S plots of CdS NWs probed under different frequencies .....                                                                            | S17      |
| <b>Figure S15</b> CV curves, the Kubelka–Munk function, and the plasmon excitation .....                                                                   | S18      |
| <b>Figure S16</b> In-situ high-resolution XPS spectra for Au <sub>1-x</sub> Ag <sub>x</sub> /CdS NWs heterostructure .....                                 | S19      |
| <b>Figure S17</b> Photocatalytic mechanism of hydrogenation of nitroaromatics .....                                                                        | S20      |
| <b>Figure S18</b> Photocatalytic mechanism of selective oxidation reaction .....                                                                           | S21      |
| <b>Table S1</b> Peak position with corresponding functional groups for different samples .....                                                             | S22      |
| <b>Table S2</b> Summary of specific surface area, pore volume and pore size of different samples .....                                                     | S23      |
| <b>Table S3</b> Chemical bond species vs. B.E. for the different samples .....                                                                             | S24      |
| <b>Table S4</b> ICP result of Au <sub>1-x</sub> Ag <sub>x</sub> /CdS NWs heterostructure .....                                                             | S25      |
| <b>Table S5</b> Fitted EIS results of different samples .....                                                                                              | S26      |
| <b>Table S6</b> Time-resolved PL decay parameters of CdS NWs and Au <sub>1-x</sub> Ag <sub>x</sub> /CdS NWs .....                                          | S27      |
| <b>References</b> .....                                                                                                                                    | S28      |

## Experimental section

### 1. Materials

Deionized water (DI H<sub>2</sub>O, Millipore, 18.2 MΩ cm resistivity), sodium diethyldithiocarbamate trihydrate (C<sub>5</sub>H<sub>10</sub>NNaS<sub>2</sub>·3H<sub>2</sub>O), cadmium chloride (CdCl<sub>2</sub>·2.5H<sub>2</sub>O), ethylenediamine (C<sub>2</sub>H<sub>8</sub>N<sub>2</sub>), 2-mercaptoethylamine (MEA), tetrachloroauric (III) acid (HAuCl<sub>4</sub>·3H<sub>2</sub>O, 99.99%), silver nitrate (AgNO<sub>3</sub>), L-glutathione (GSH), 4-nitroaniline (4-NA), 3-nitroaniline (3-NA), 2-nitroaniline (2-NA), 4-nitrophenol (4-NP), 3-nitrophenol (3-NP), 2-nitrophenol (2-NP), 1-bromo-4-nitrobenzene, 1-chloro-4-nitrobenzene, 4-nitroanisole, 4-nitrotoluene (4-NT), nitrobenzene (NB), o-nitroacetophenone were obtained from Sinopharm Chemical Reagent Co, Ltd. (Shanghai, China). benzyl alcohol (BA), *p*-methylbenzyl alcohol, *p*-methoxybenzyl alcohol (MOBA), *p*-fluorobenzyl alcohol, *p*-chlorobenzyl alcohol, *p*-nitrobenzyl alcohol, and 3-methyl-2-buten-1-ol potassium peroxydisulfate (K<sub>2</sub>S<sub>2</sub>O<sub>8</sub>), benzoquinone (BQ), ammonium oxalate (AO), *tert*-butanol (*t*-BuOH) was obtained from Sigma-Aldrich. All materials were used as received without further purification.

### 2 Preparation of photoelectrodes

The working electrodes were prepared on fluorine-doped tin oxide (FTO) glass that was cleaned by sonication in ethanol for 30 min and dried at 353 K. The boundary of FTO glass was protected using scotch tape. The 5 mg sample was completely dispersed in 0.5 mL of ethyl alcohol absolute by sonication to get slurry which uniformly was spread onto the pretreated FTO glass. After drying in the air, the working electrode was further dried at 353K for 2 h to improve adhesion. Then the Scotch tape was unstuck and the exposed area of the working electrode was 1 cm<sup>2</sup>. Besides, Na<sub>2</sub>SO<sub>4</sub> (0.5 M, pH=6.69) aqueous solution was used as the electrolyte

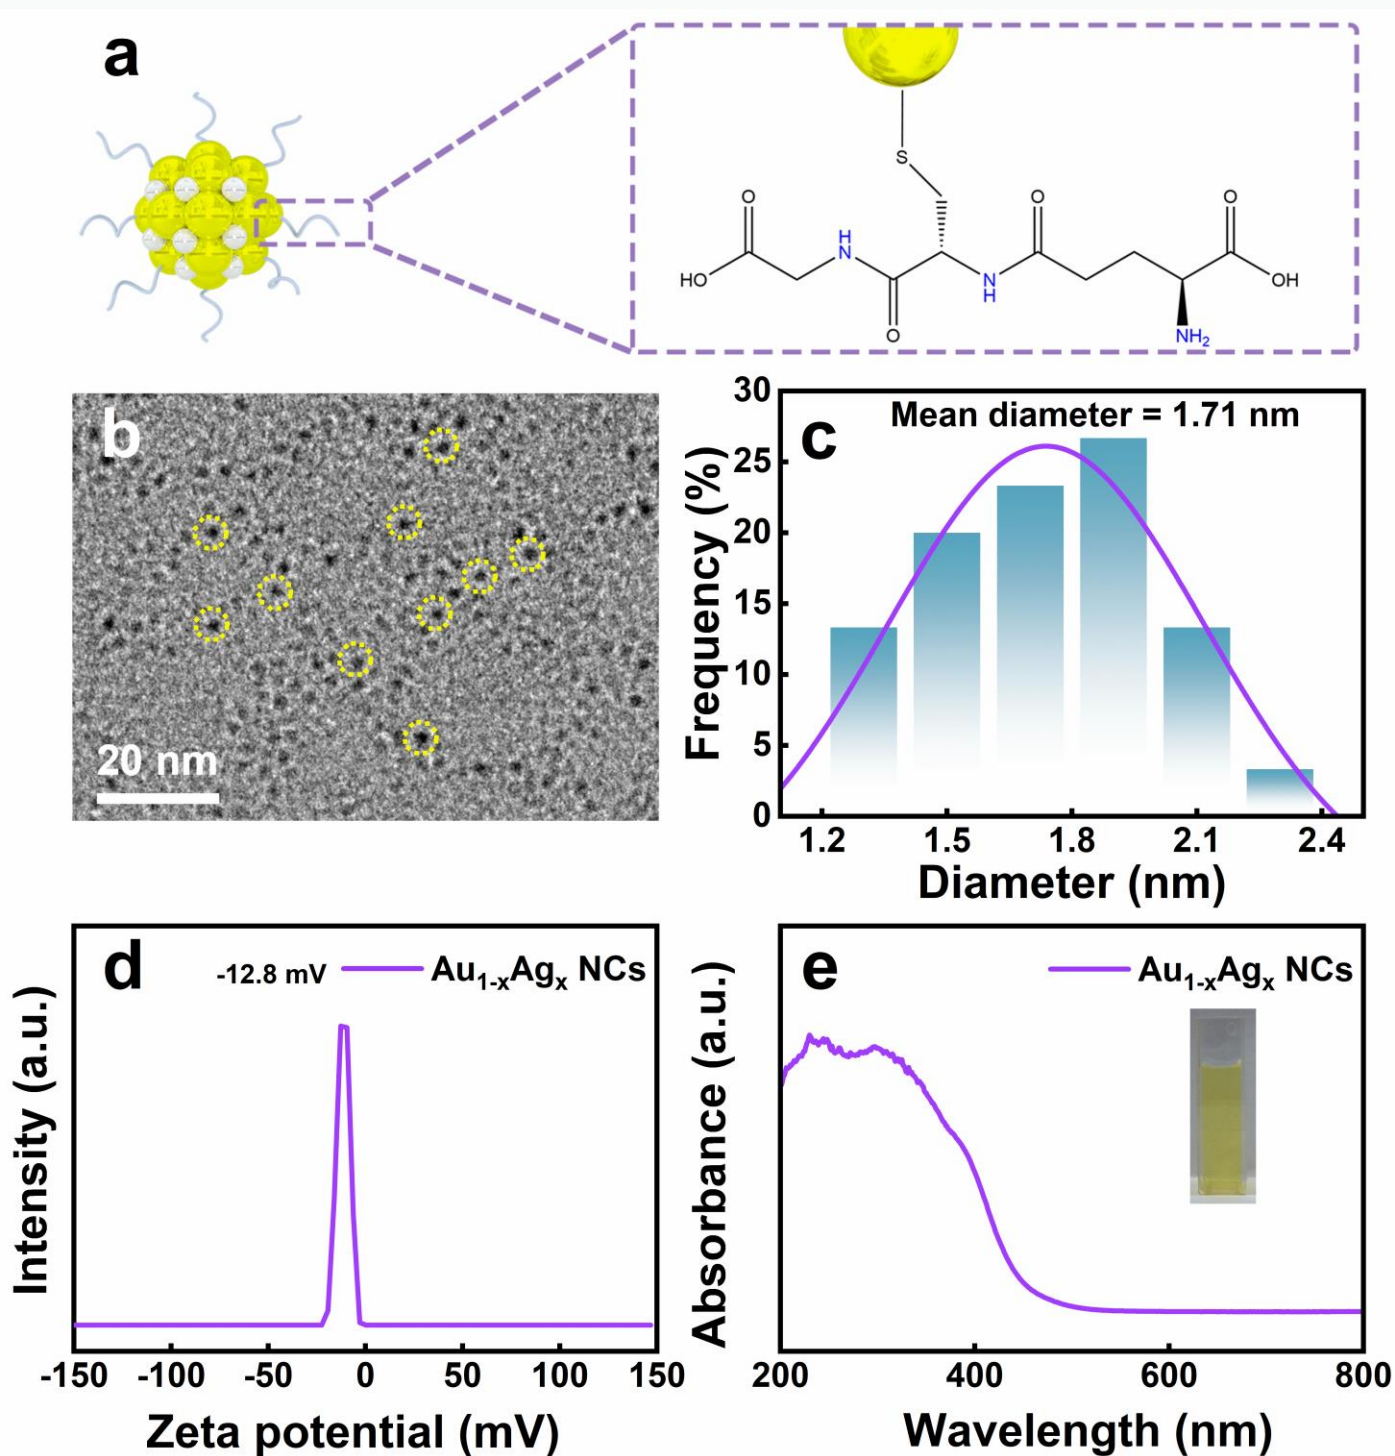

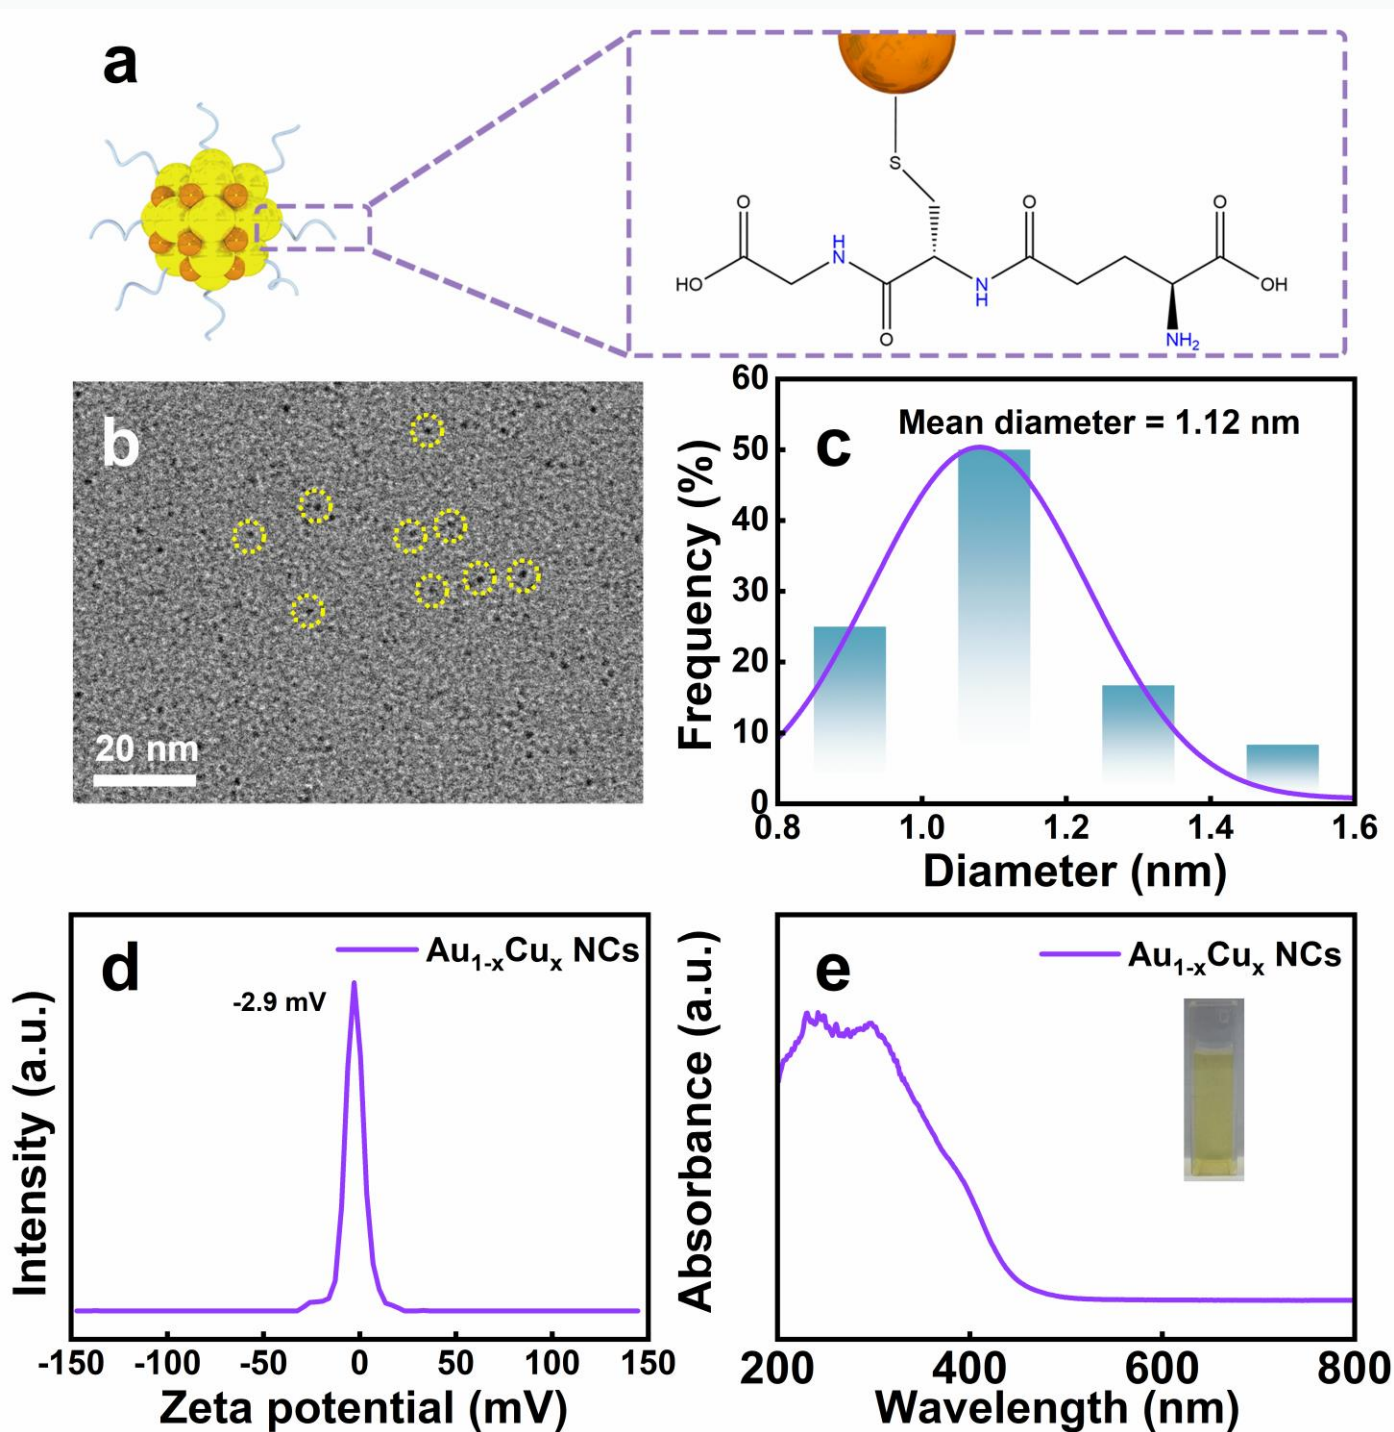

**Figure S2.** (a) Schematic model illustrating the molecule structure of Au<sub>1-x</sub>Cu<sub>x</sub> NCs and surface ligand (GSH), (b) TEM image of Au<sub>1-x</sub>Cu<sub>x</sub> NCs, (c) size distribution histogram, (d) zeta potential of Au<sub>1-x</sub>Cu<sub>x</sub> NCs, (e) UV-vis absorption spectrum of Au<sub>1-x</sub>Cu<sub>x</sub> NCs with photograph in the inset.

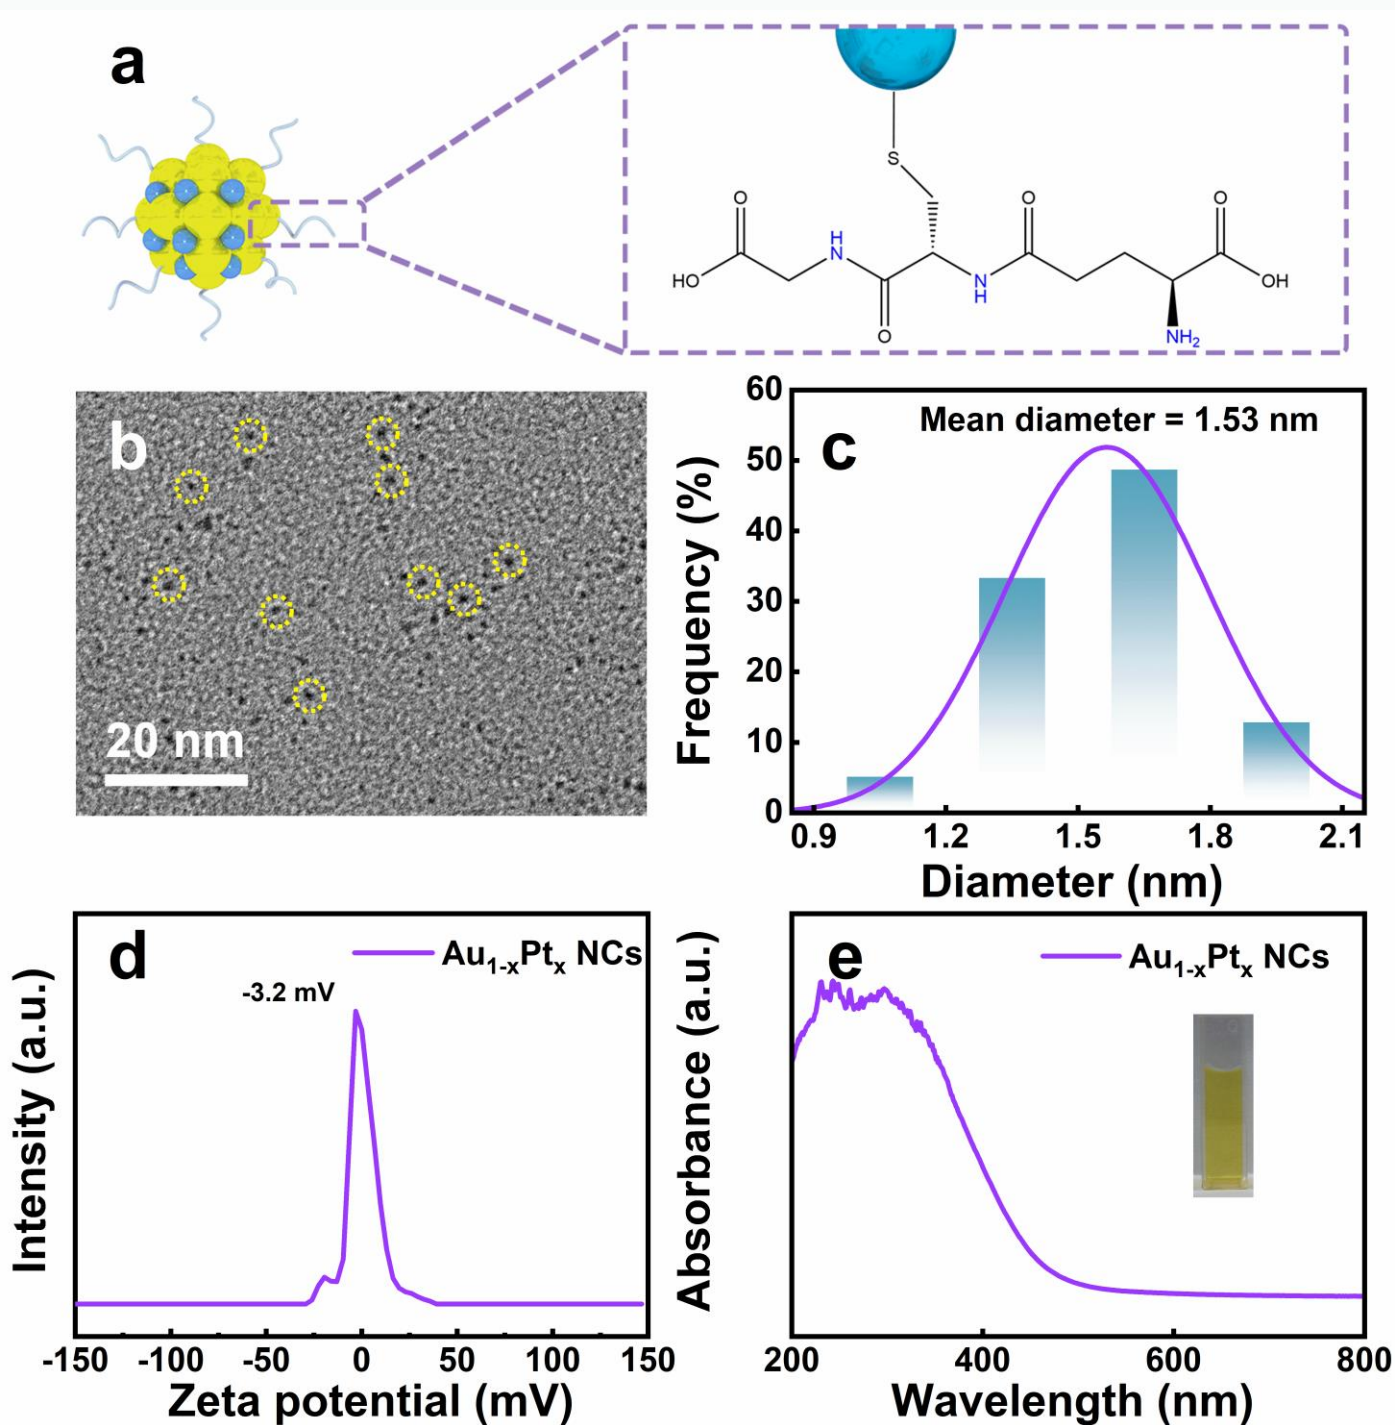

**Figure S3.** (a) Schematic model illustrating the molecule structure of Au<sub>1-x</sub>Pt<sub>x</sub> NCs and surface ligand (GSH), (b) TEM image of Au<sub>1-x</sub>Pt<sub>x</sub> NCs, (c) size distribution histogram, (d) zeta potential of Au<sub>1-x</sub>Pt<sub>x</sub> NCs, (e) UV-vis absorption spectrum of Au<sub>1-x</sub>Pt<sub>x</sub> NCs with photograph in the inset.

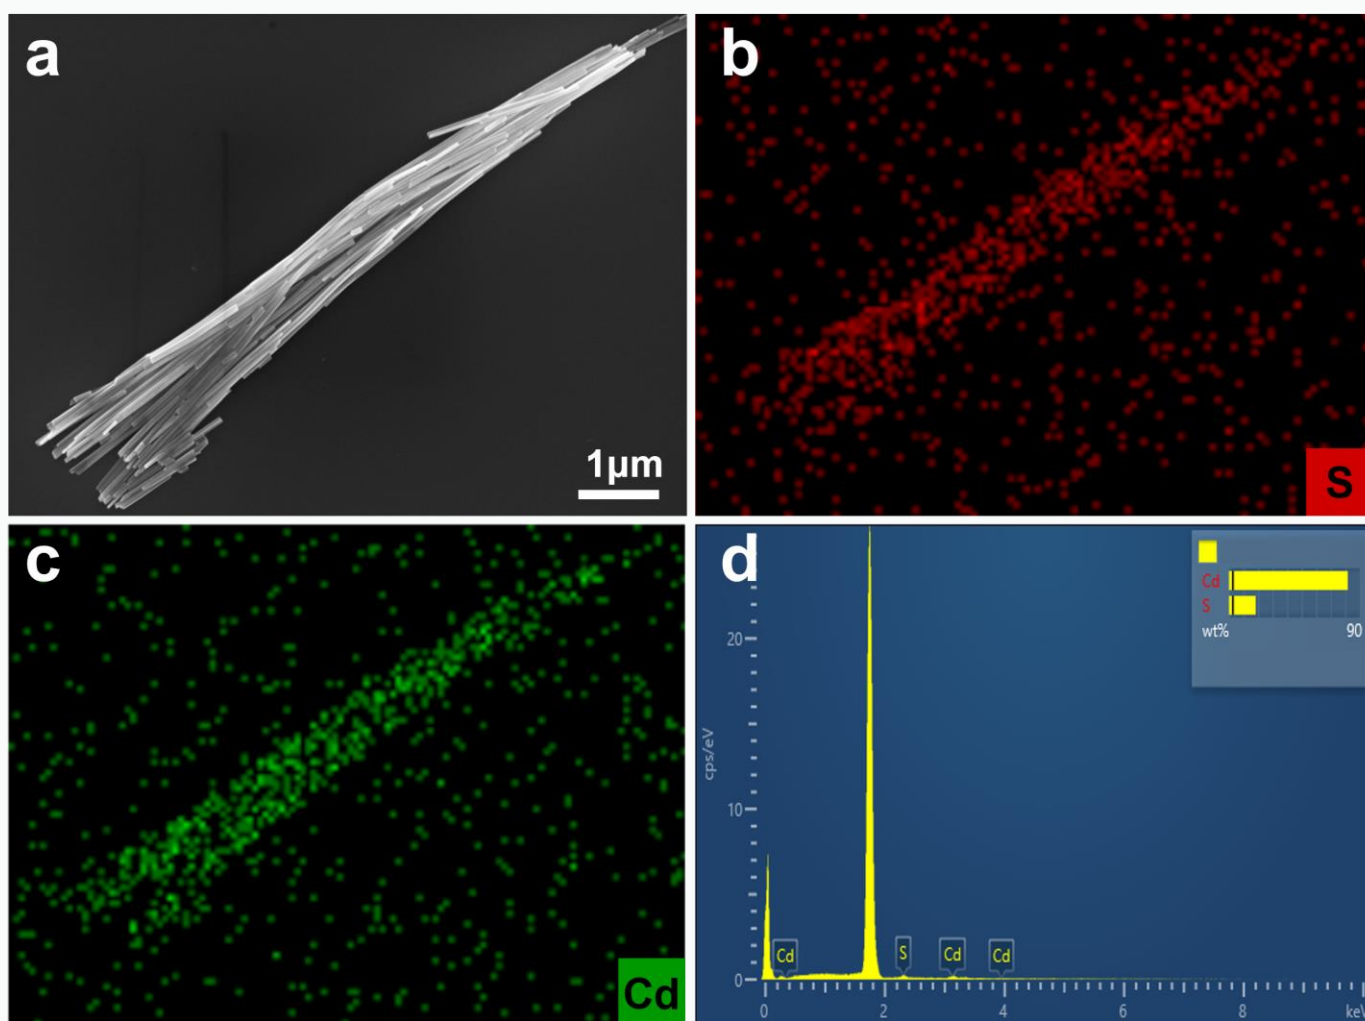

**Figure S4.** (a) SEM images of CdS NWs and (b-c) elemental mapping results of CdS NWs along with (d) EDS result.

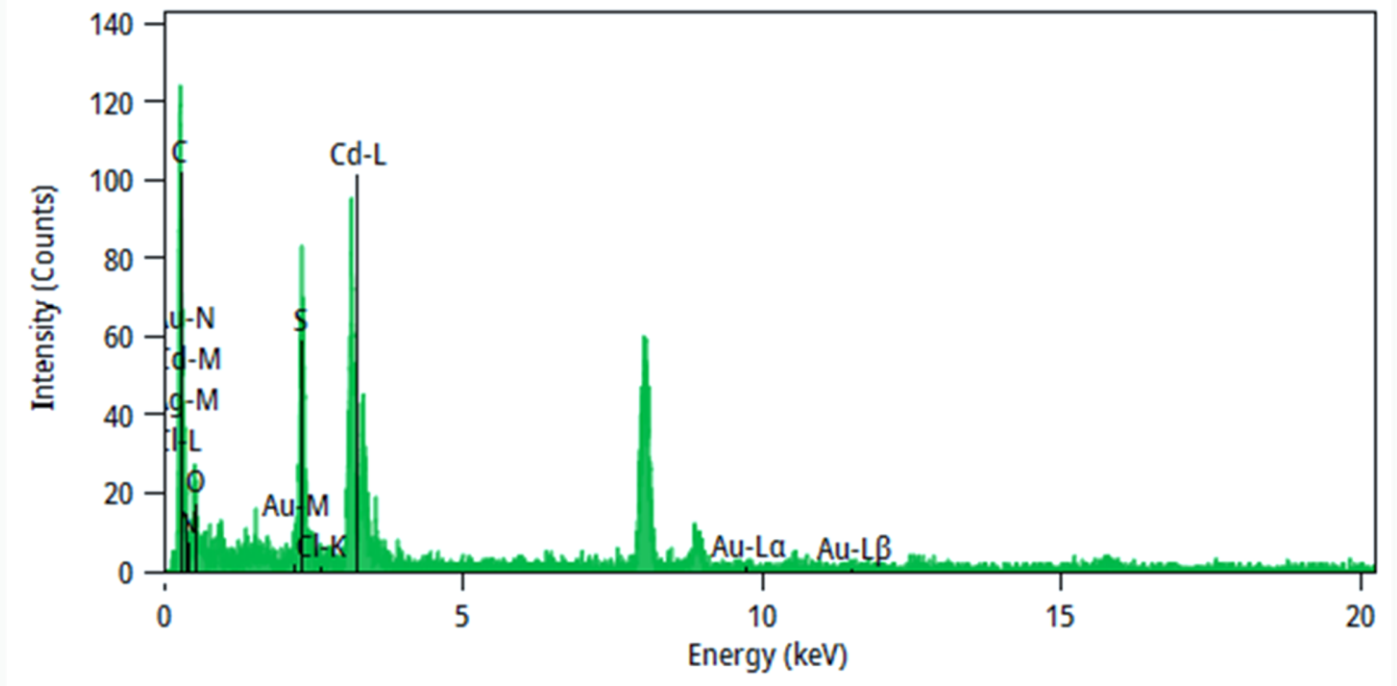

**Figure S5.** EDS result of Au<sub>1-x</sub>Ag<sub>x</sub>/CdS NWs



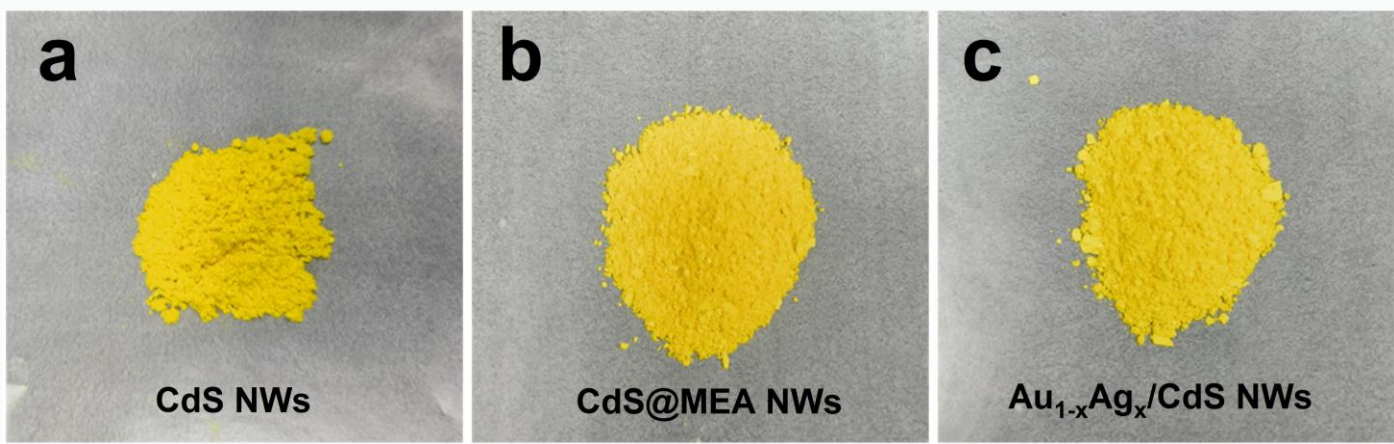

**Figure S6.** Sample colors of (a) CdS NWs, (b) CdS@MEA NWs and (c) Au<sub>1-x</sub>Ag<sub>x</sub>/CdS NWs heterostructure.

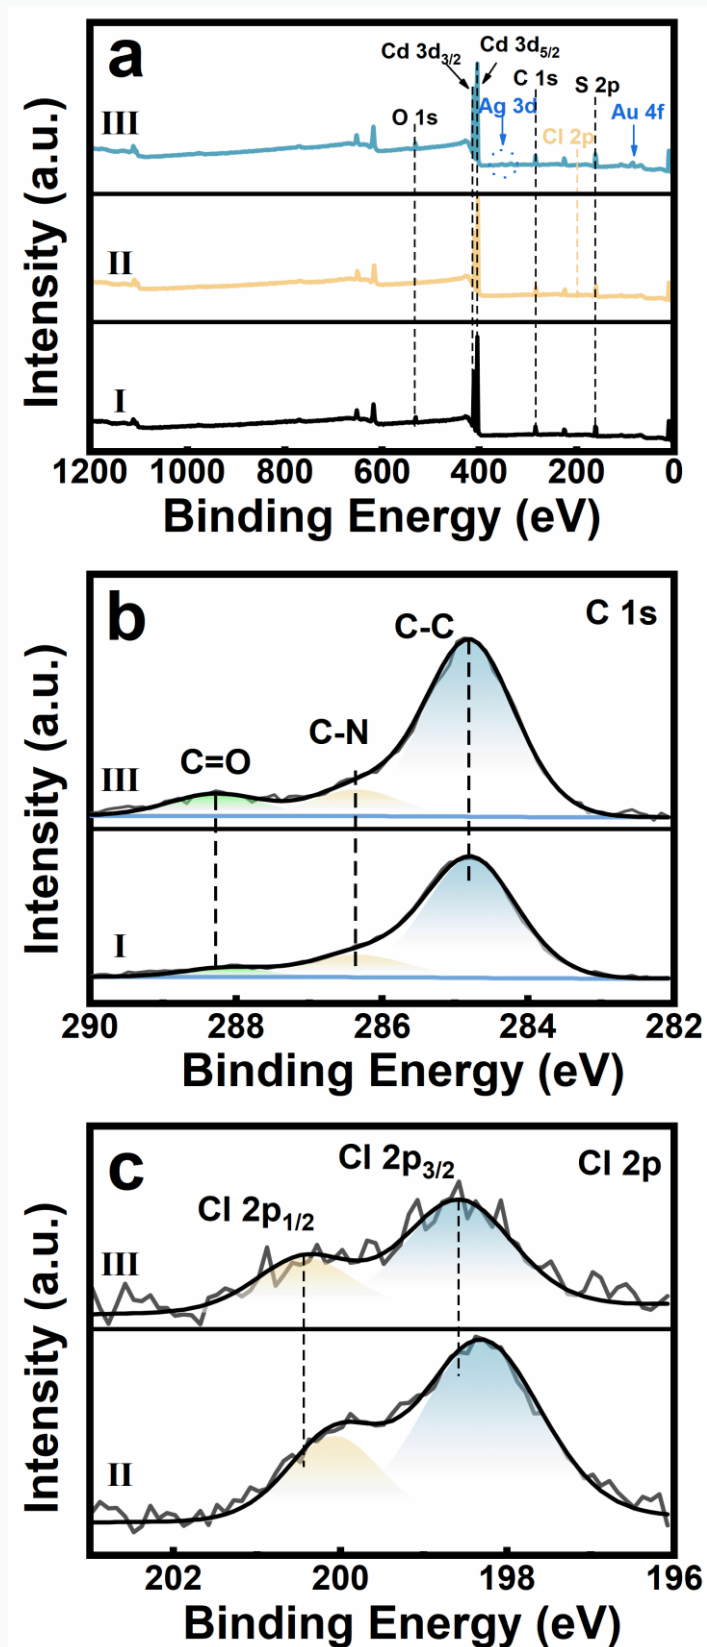

**Figure S7.** (a) Survey spectra and high-resolution (b) C 1s and (c) Cl 2p spectra of (I) CdS NWs, (II) CdS@MEA NWs and (III) Au<sub>1-x</sub>Ag<sub>x</sub>/CdS NWs heterostructure.

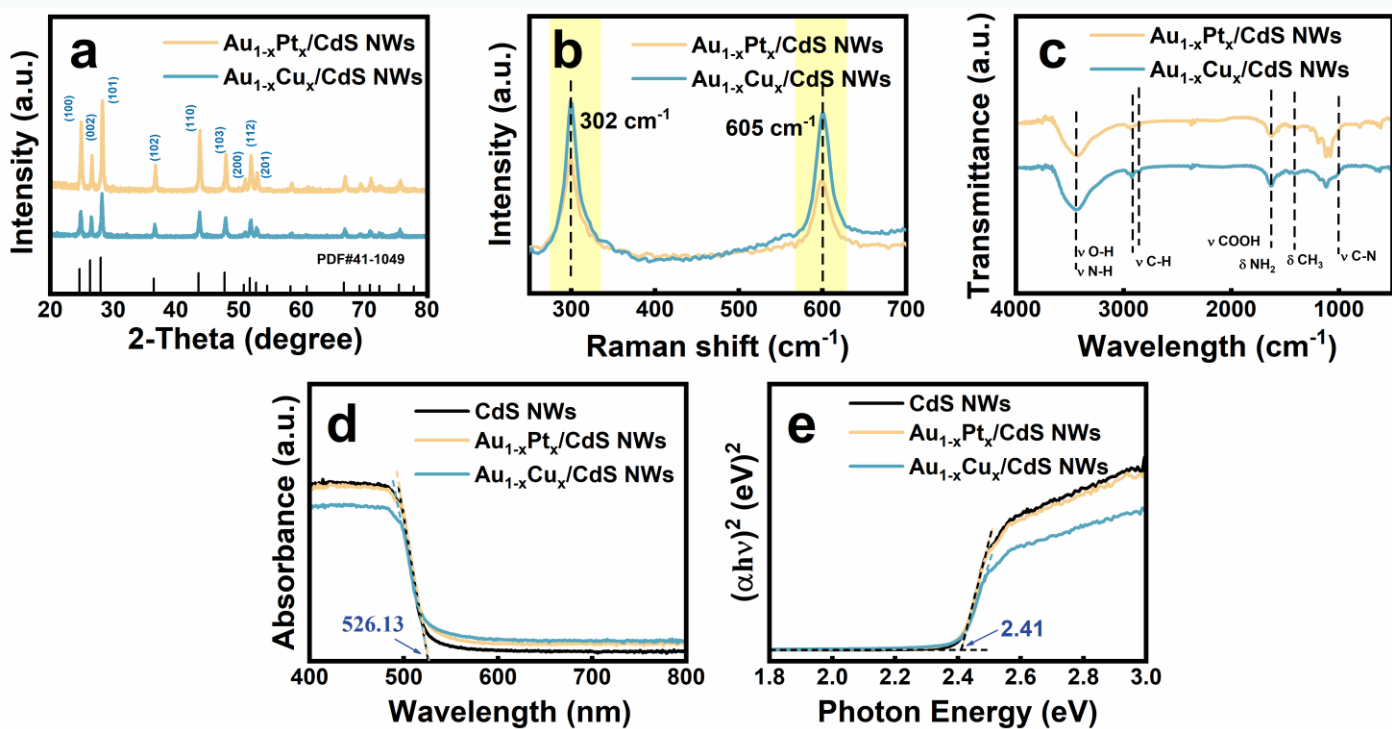

**Figure S8.** (a) XRD results, (b) Raman, (c) FTIR, (d) DRS results of pristine CdS,  $Au_{1-x}Pt_x/CdS$  NWs and  $Au_{1-x}Cu_x/CdS$  NWs heterostructure with (e) bandgap determination plots.

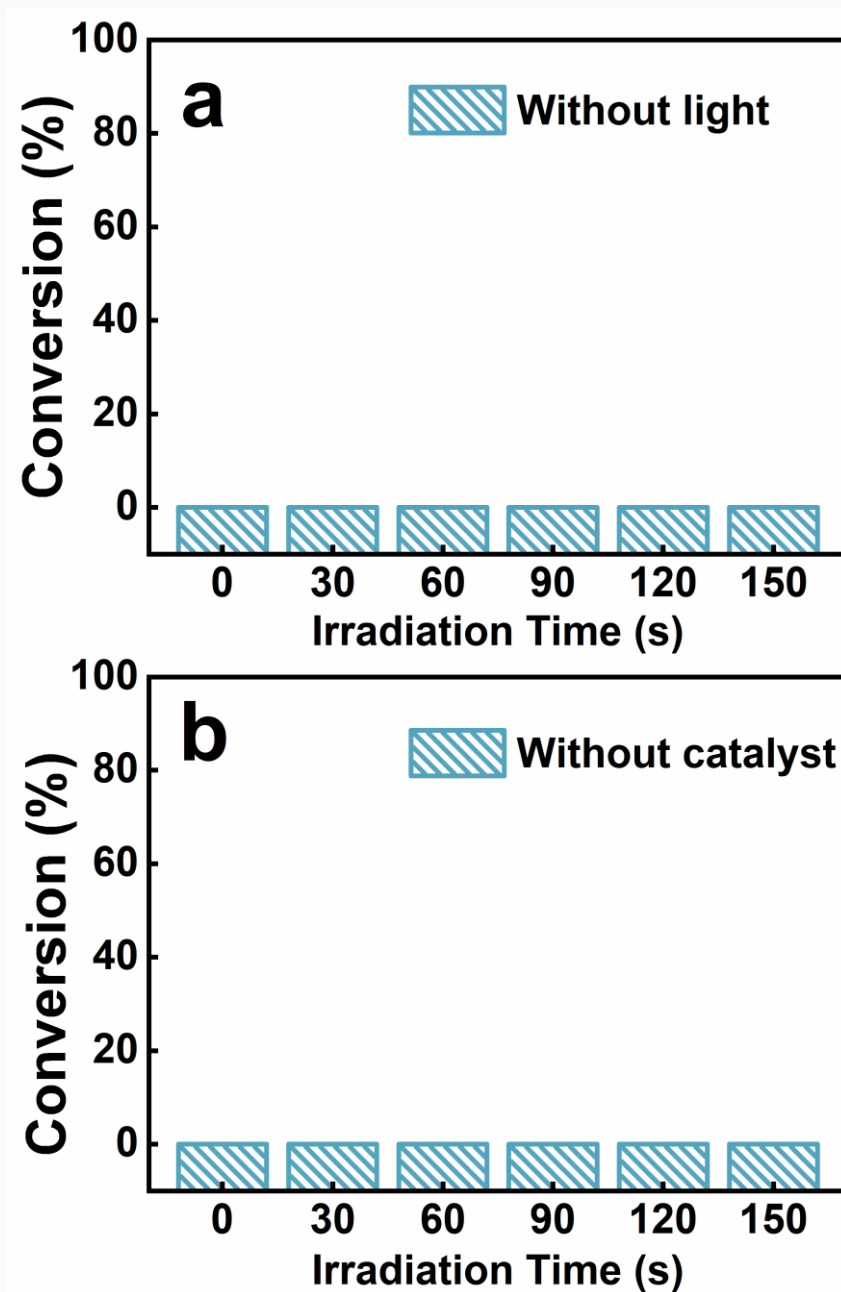

**Figure S9.** Blank experiments for photocatalytic reduction of 4-NA (a) without light and (b) catalyst.

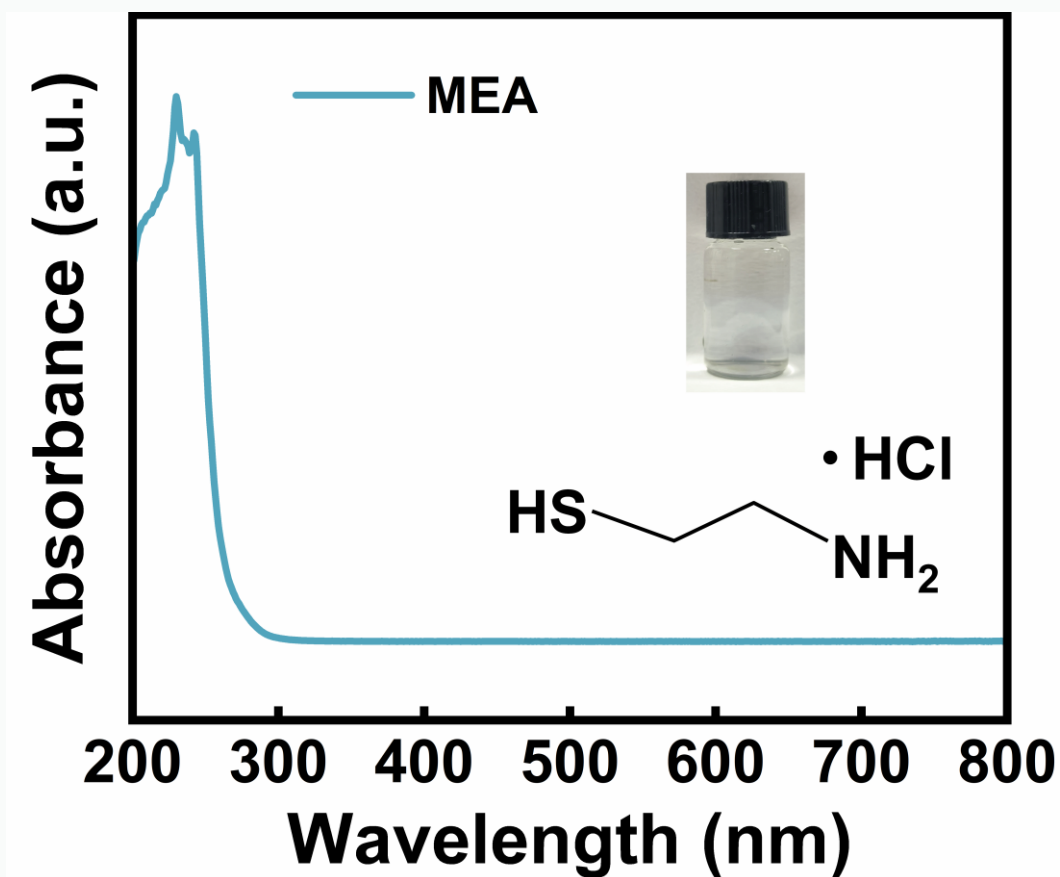

**Figure S10.** UV-vis absorption spectrum of MEA aqueous solution with photograph and molecular structure in the inset.

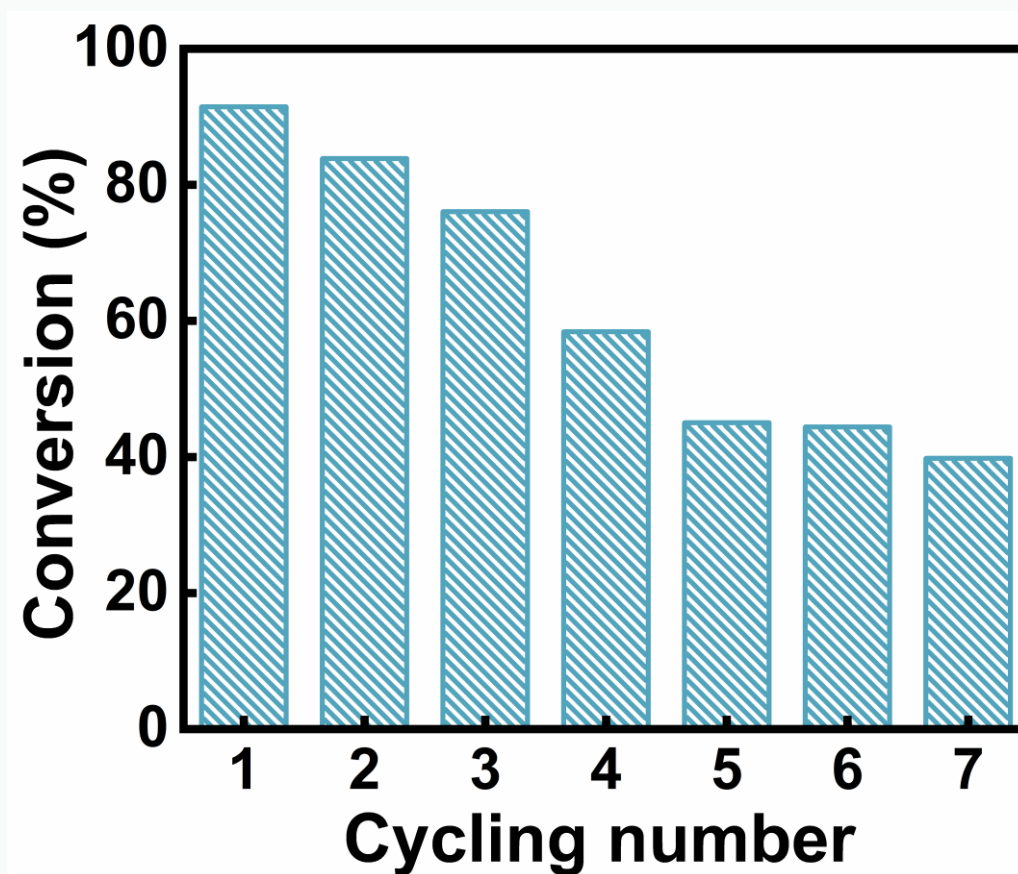

**Figure S11.** Cyclic reactions of  $\text{Au}_{1-x}\text{Ag}_x$  /CdS NWs heterostructure toward photoreduction of 4-NA.

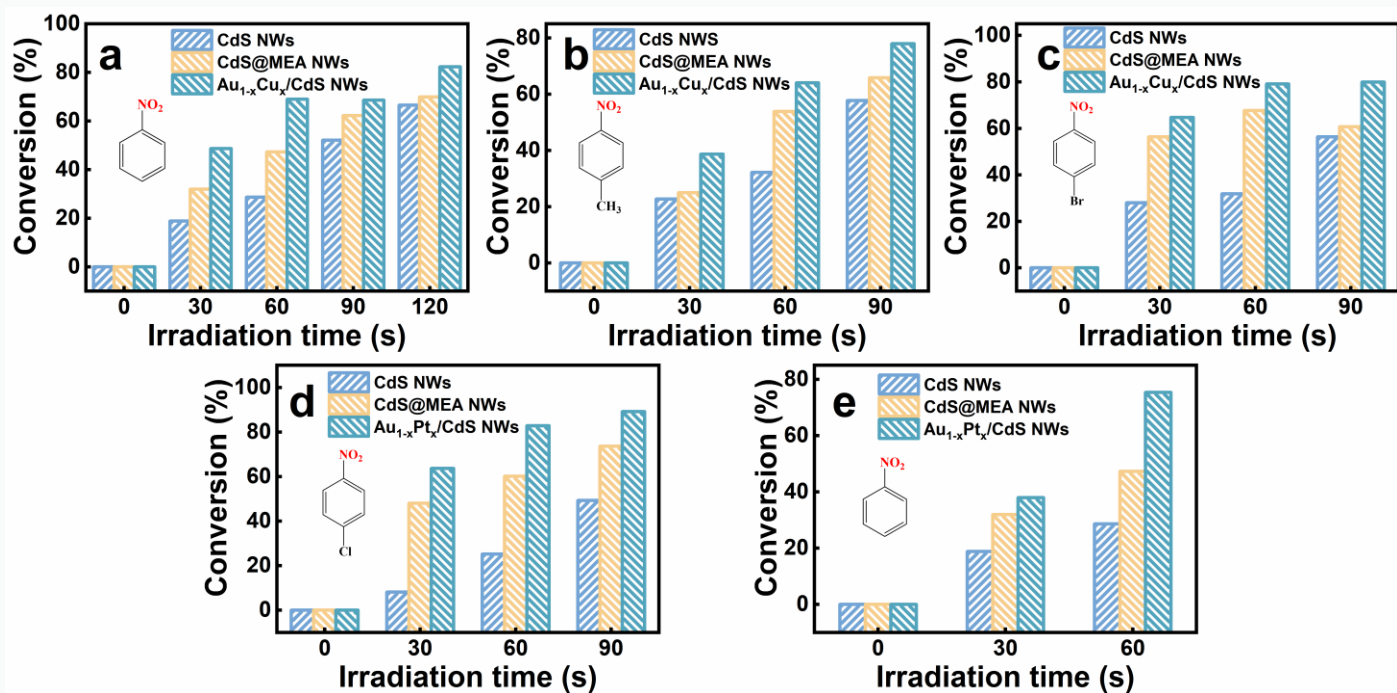

**Figure S12.** Photoactivities of pristine CdS NWs, CdS@MEA NWs, and Au<sub>1-x</sub>Cu<sub>x</sub>/CdS NWs heterostructure towards photoreduction of (a) NB, (b) 4-NT, and (c) 1-bromo-4-nitrobenzene, under visible light irradiation ( $\lambda > 420$  nm) with adding hole scavenger and nitrogen bubbling at ambient conditions. Photoactivities of pristine CdS NWs, CdS@MEA NWs, and Au<sub>1-x</sub>Pt<sub>x</sub>/CdS NWs heterostructure towards photo reduction of (d) 1-chloro-4-nitrobenzene, (e) NB under visible light irradiation ( $\lambda > 420$  nm).

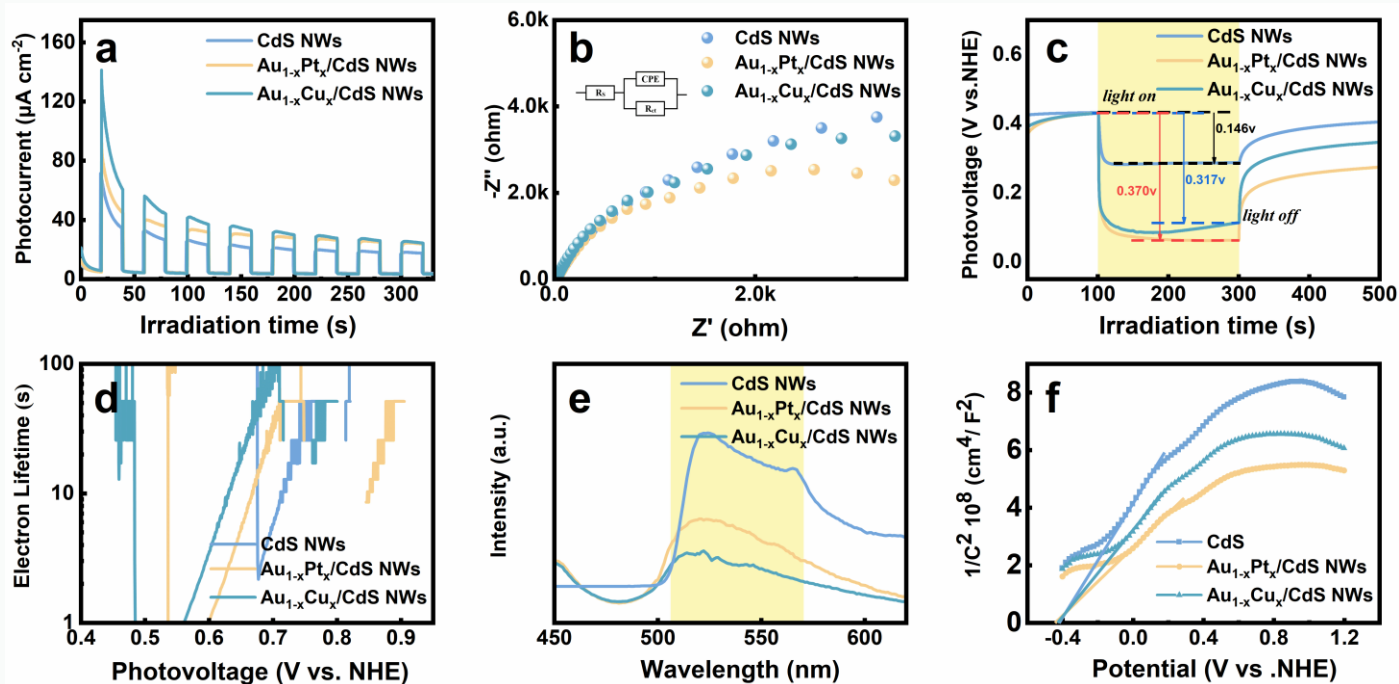

**Figure S13.** (a) On–off transient photocurrents, (b) EIS results, (c) open-circuit potential decays and (d) electron lifetime ( $\tau_n$ ), and (e) PL spectra of pristine CdS NWs,  $\text{Au}_{1-x}\text{Pt}_x/\text{CdS}$  NWs and  $\text{Au}_{1-x}\text{Cu}_x/\text{CdS}$  NWs heterostructure as well as (f) Mott-Schottky plots.



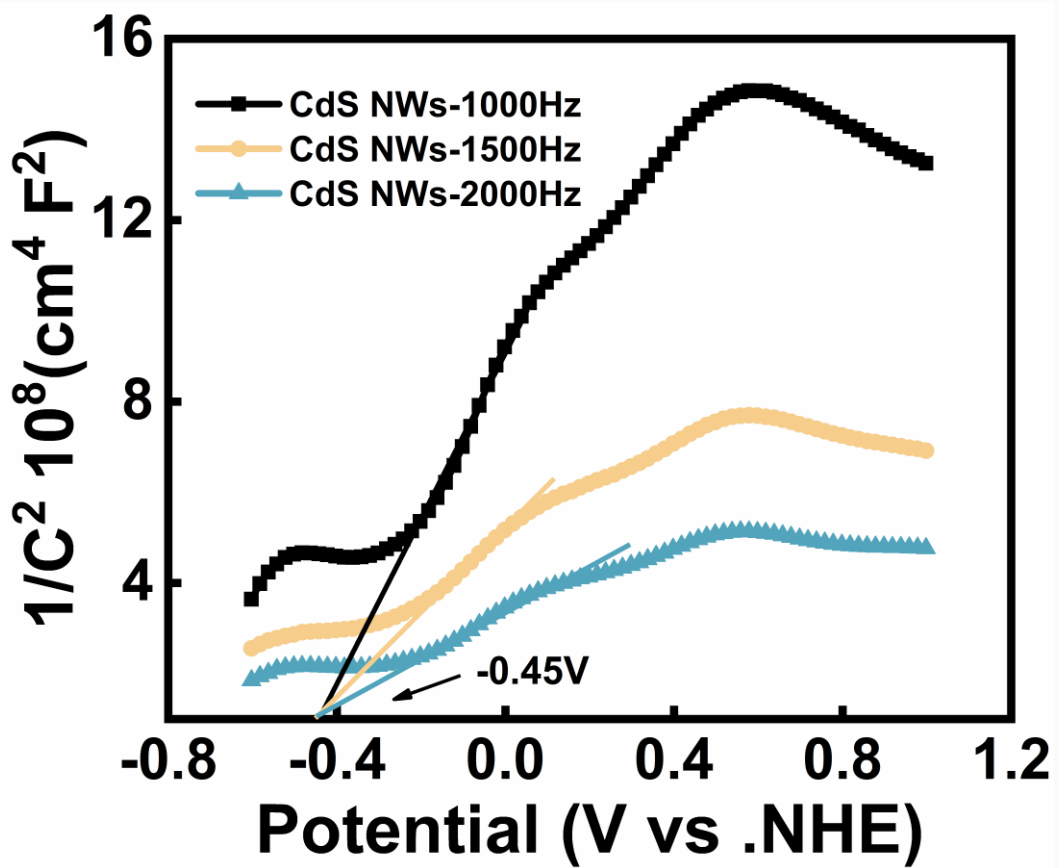

Figure S14. Mott-Schottky plots of CdS NWs probed under different frequencies.

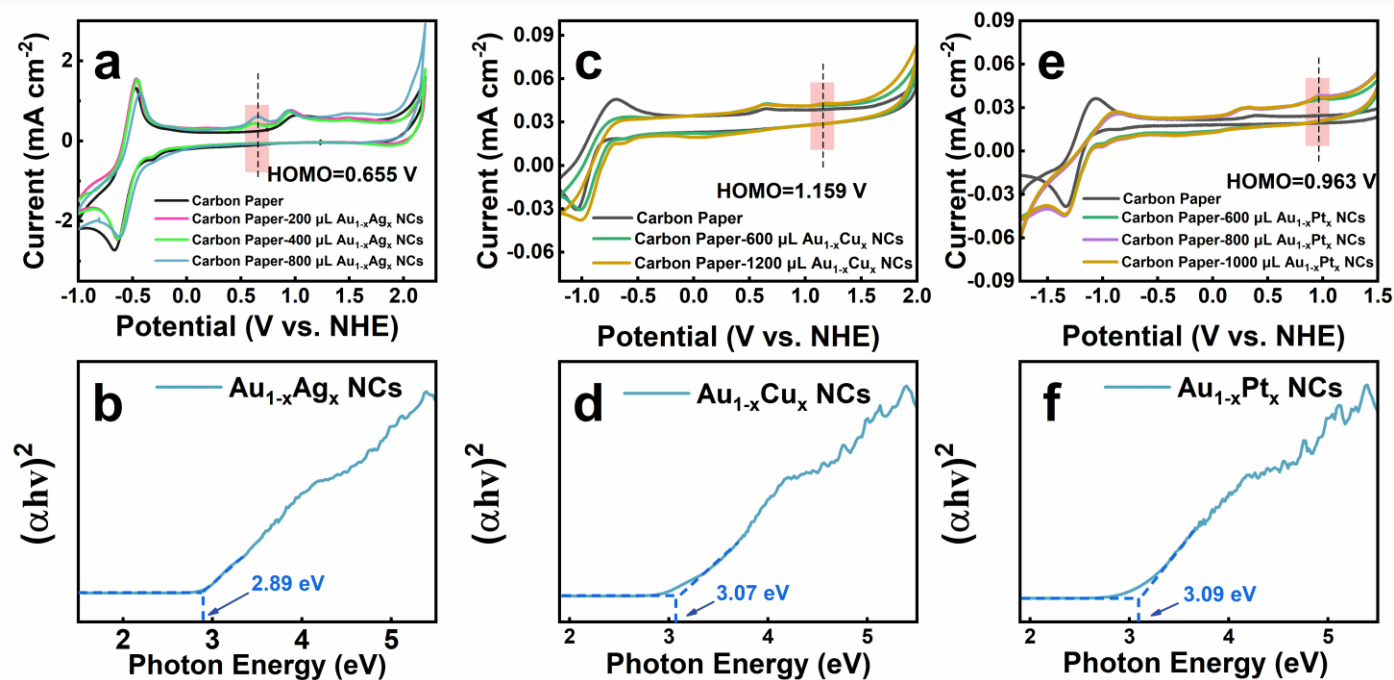

**Figure S15.** CV curves of (a) Au<sub>1-x</sub>Ag<sub>x</sub> NCs, (c) Au<sub>1-x</sub>Cu<sub>x</sub> NCs and (e) Au<sub>1-x</sub>Pt<sub>x</sub> NCs. (electrolyte: degassed acetonitrile containing 0.1 mol L<sup>-1</sup> TEAP); Transformed plots based on the Kubelka–Munk function vs. energy of light for (b) Au<sub>1-x</sub>Ag<sub>x</sub> NCs, (d) Au<sub>1-x</sub>Cu<sub>x</sub> NCs and (f) Au<sub>1-x</sub>Pt<sub>x</sub> NCs.

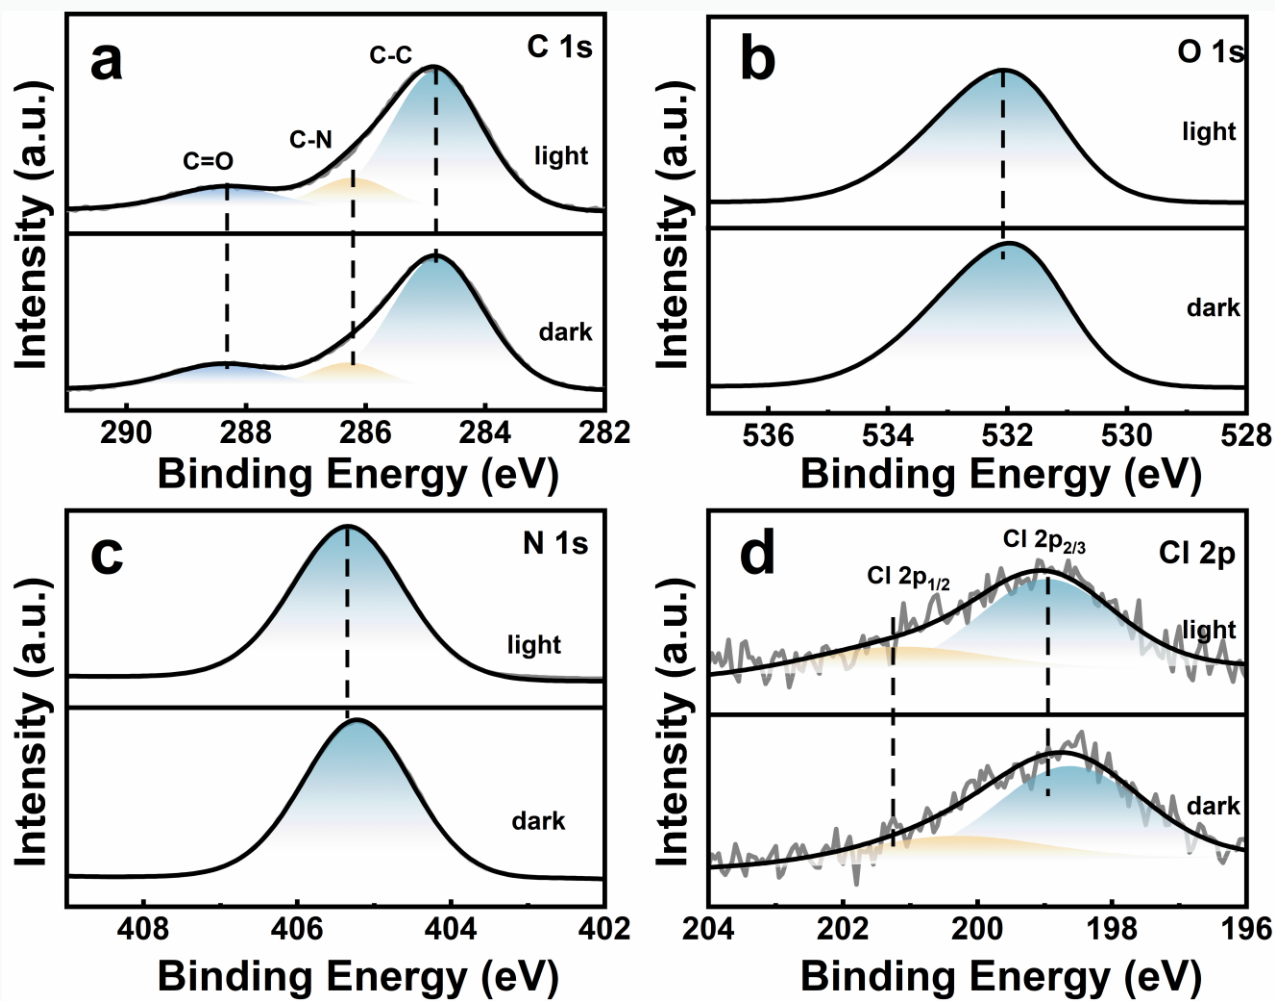

**Figure S16.** In-situ high-resolution XPS spectra of (a) C 1s, (b) O 1s (c) N 1s (d) Cl 2p for Au<sub>1-x</sub>Ag<sub>x</sub>/CdS NWs heterostructure.

## Reduction

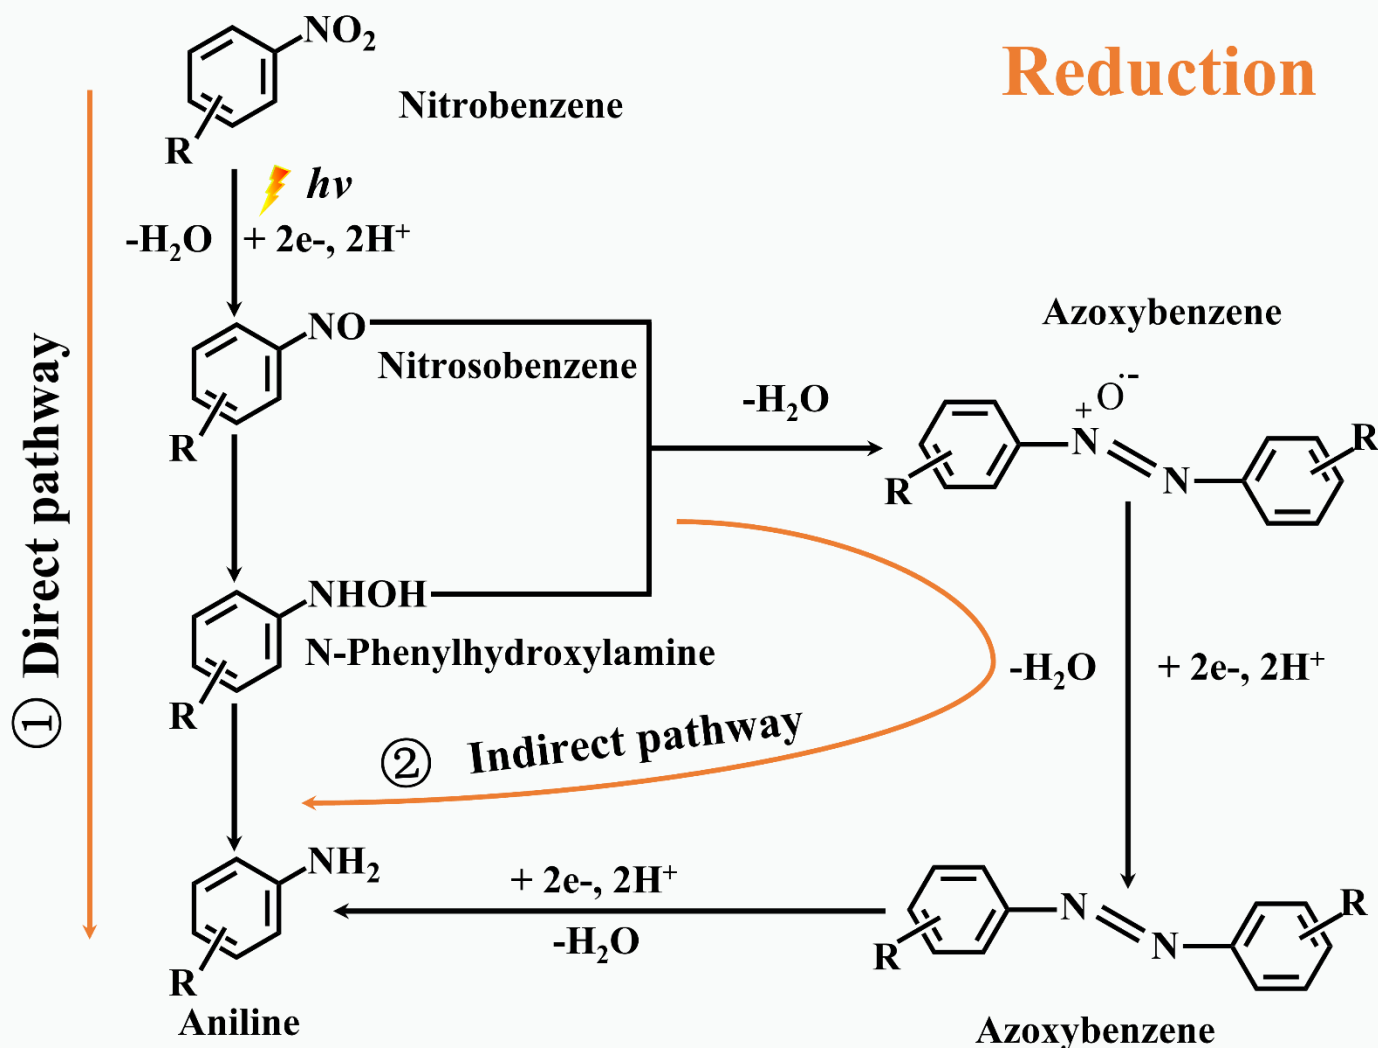

**Figure S17.** Photocatalytic mechanism of hydrogenation of nitroaromatics

**Note:** According to the previous works,<sup>1, 2</sup> there are two possible pathways for photocatalytic reduction of aromatic nitro compounds, which involve direct and indirect reaction pathways. The direct route involves gradual formation of nitrosobenzene (Ph-NO), phenylhydroxylamine (Ph-NHOH) and finally aniline (Ph-NH<sub>2</sub>), following three consecutive hydrogenation steps. The second pathway, commonly named indirect or condensation route, involves the condensation of nitrosobenzene (Ph-N=NO-Ph), sequence azo (R-N=N-R), hydrazo (R-NH-NH-R), and finally aniline.

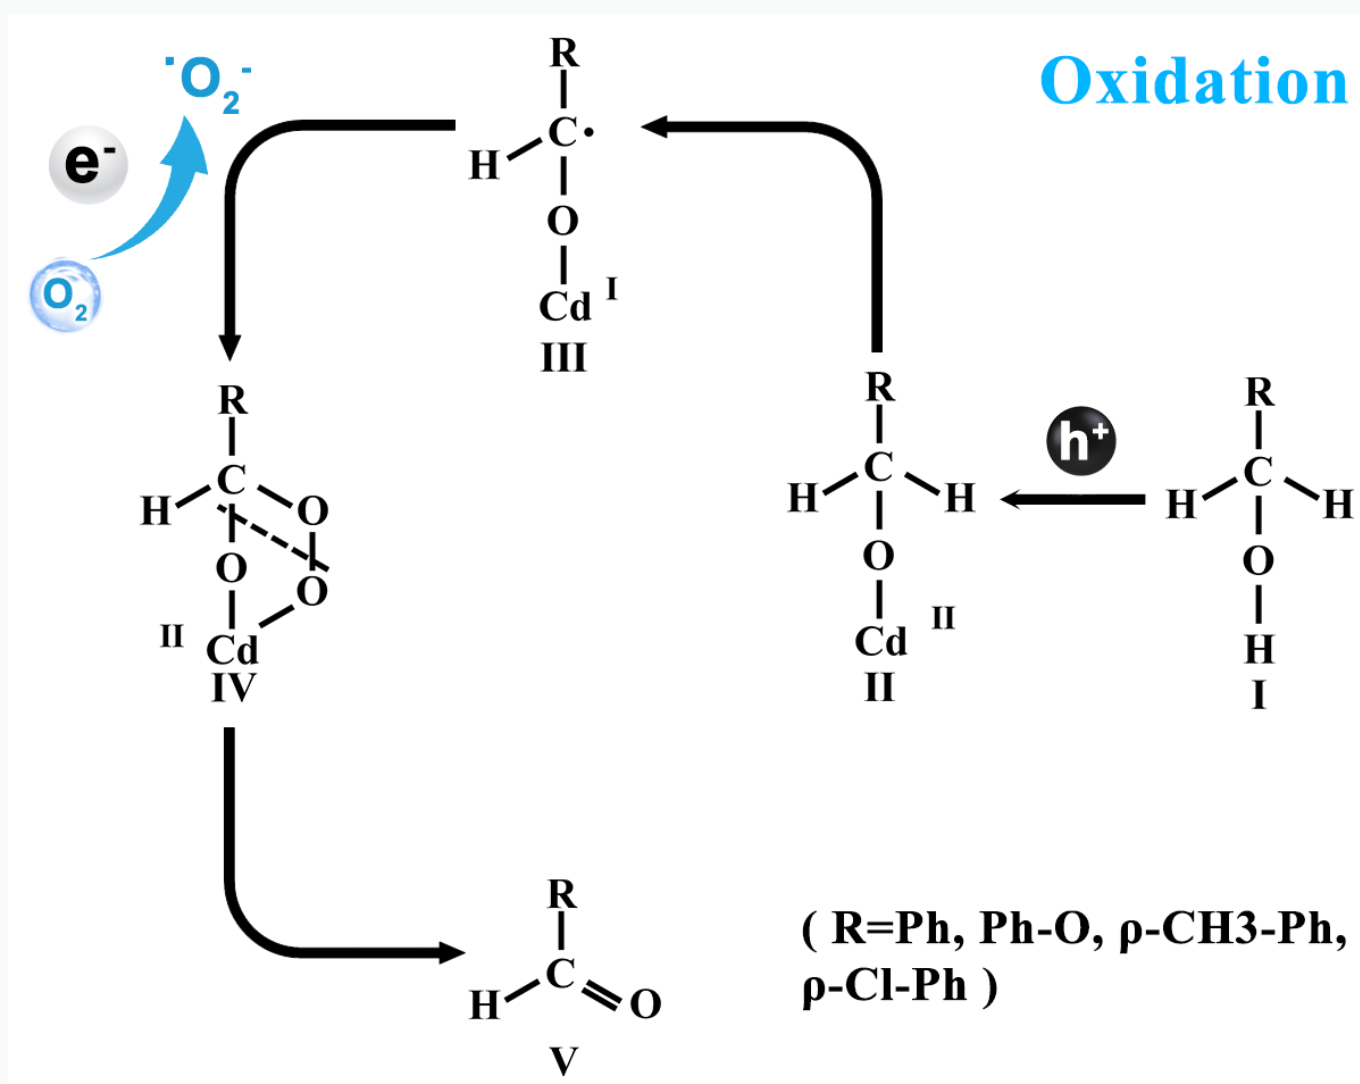

**Figure S18.** Photocatalytic mechanism of selective oxidation reaction

**Note:** Concerning the selective photocatalytic oxidation of aromatic alcohols to aldehydes, electrons injected into the CB of CdS are captured to generate Cd<sup>I</sup> species and the alcohol molecules are adsorbed on the CdS surface to form structure **II** through deprotonation.<sup>3-5</sup> Subsequently, the adsorbent alcohol molecule first reacts with holes and then deprotonates to form carbon radicals, while electrons are captured by Cd<sup>I</sup> to form Cd<sup>II</sup>. It is worthwhile noting that electrons can directly combine with the dissolved O<sub>2</sub> molecules to engender superoxide ( $\cdot\text{O}_2^-$ ) radicals [ $E^\circ(\text{O}_2/\cdot\text{O}_2^-) = -0.284 \text{ V vs. NHE}$ ].<sup>6</sup> In this regard, the thus-formed  $\cdot\text{O}_2^-$  radicals take part in the oxidation of aromatic alcohols to aldehydes and attack the carbon radical to form intermediate **IV**, for which the interactions between the C–O bonds of the alcohol and O–O bonds of dioxygen may be synergistically realized through the oxygen-bridged structure **IV**.<sup>7</sup> Alternatively, holes accumulating in the HOMO level of alloyed NCs can also directly oxidize the aromatic alcohols to aldehydes, fulfilling the selective photocatalytic oxidation process.

**Table S1.** Peak position with corresponding functional groups for different samples.

| <i>Peak position (cm<sup>-1</sup>)</i> | <b>Au<sub>1-x</sub>Ag<sub>x</sub>/CdS NWs</b> | <b>Au<sub>1-x</sub>Cu<sub>x</sub>/CdS NWs</b> | <b>Au<sub>1-x</sub>Pt<sub>x</sub>/CdS NWs</b> |
|----------------------------------------|-----------------------------------------------|-----------------------------------------------|-----------------------------------------------|
| 3425                                   | -NH <sub>2</sub> , -OH <sup>8,9</sup>         | -NH <sub>2</sub> , -OH                        | -NH <sub>2</sub> , -OH                        |
| 2920&2851                              | -CH <sub>2</sub> <sup>10,11</sup>             | -CH <sub>2</sub>                              | -CH <sub>2</sub>                              |
| 1635                                   | -COOH, -NH <sub>2</sub> <sup>12</sup>         | -COOH, -NH <sub>2</sub>                       | -COOH, -NH <sub>2</sub>                       |
| 1446                                   | -CH <sub>3</sub> <sup>9</sup>                 | -CH <sub>3</sub>                              | -CH <sub>3</sub>                              |
| 1039                                   | -C-N- <sup>8</sup>                            | -C-N-                                         | -C-N-                                         |

**Table S2.** Summary of the specific surface area, pore volume and pore size of CdS NWs and Au<sub>1-x</sub>Ag<sub>x</sub>/CdS NWs heterostructure.

| <i>Samples</i>                             | <i>S<sub>BET</sub></i><br><i>(m<sup>2</sup> /g)<sup>a</sup></i> | <i>Total pore volume</i><br><i>(cm<sup>3</sup> /g)<sup>b</sup></i> | <i>Average pore size</i><br><i>(nm)<sup>c</sup></i> |
|--------------------------------------------|-----------------------------------------------------------------|--------------------------------------------------------------------|-----------------------------------------------------|
| CdS NWs                                    | 22.2760                                                         | 0.040400                                                           | 7.2544                                              |
| Au <sub>1-x</sub> Ag <sub>x</sub> /CdS NWs | 21.7130                                                         | 0.036321                                                           | 6.6911                                              |

<sup>a</sup> BET surface area is calculated from the linear part of BET plots.

<sup>b</sup> Single point total pore volume of the pores at P/P0 = 0.95.

<sup>c</sup> Adsorption average pore width (4V/A by BET).

**Table S3.** Chemical bond species vs. B.E. for different samples.

| <i>Elements</i>      | <i>CdS</i> | <i>Au<sub>1-x</sub>Ag<sub>x</sub> NCs</i> | <i>Chemical Bond Species</i> |
|----------------------|------------|-------------------------------------------|------------------------------|
| C 1s A               | 284.80     | 284.80                                    | C-C                          |
| Cd 3d <sub>5/2</sub> | 404.94     | 405.09                                    | Cd <sup>2+</sup> 13          |
| Cd 3d <sub>3/2</sub> | 411.68     | 411.83                                    | Cd <sup>2+</sup>             |
| S 2p <sub>3/2</sub>  | 161.43     | 161.51                                    | S <sup>2-</sup> 14           |
| S 2p <sub>1/2</sub>  | 162.64     | 162.70                                    | S <sup>2-</sup>              |
| Au 4f <sub>5/2</sub> | /          | 87.85                                     | Au <sup>0</sup> 15, 16       |
| Au 4f <sub>5/2</sub> | /          | 88.45                                     | Au <sup>+</sup>              |
| Au 4f <sub>7/2</sub> | /          | 84.28                                     | Au <sup>0</sup>              |
| Au 4f <sub>7/2</sub> | /          | 84.77                                     | Au <sup>+</sup>              |
| Ag 3d <sub>3/2</sub> | /          | 368.35                                    | Ag <sup>+</sup> 17, 18       |
| Ag 3d <sub>5/2</sub> | /          | 373.59                                    | Ag <sup>+</sup>              |



**Table S4.** ICP results of Au<sub>1-x</sub>Ag<sub>x</sub> /CdS NWs heterostructure.

| <i>Element</i> | <i>Concentration (wt. %)</i> | <i>RSD (%)</i> |
|----------------|------------------------------|----------------|
| Cd             | 76.5704                      | 2.00           |
| S              | 15.1494                      | 4.78           |
| Au             | 0.0085                       | 5.10           |
| Ag             | 0.0008                       | 5.80           |

**Table S5.** Fitted EIS results of different samples based on the equivalent circuit.

| <i>Photoanodes</i>                             | <i>R<sub>s</sub> / ohm</i> | <i>R<sub>ct</sub> / ohm</i> | <i>CPE / (<math>\times 10^{-4} F cm^{-2}</math>)</i> |
|------------------------------------------------|----------------------------|-----------------------------|------------------------------------------------------|
| CdS                                            | 15.77                      | 7512                        | 0.9874                                               |
| Au <sub>1-x</sub> Ag <sub>x</sub> @GSH/CdS NWs | 16.43                      | 5935                        | 0.7999                                               |

**Note:** As shown in Table S5,  $R_{ct}$  values were obtained by fitting the EIS results according to a simple equivalent circuit composed of a series of resistances (**Figure 5b, inset**). Apparently, Au<sub>1-x</sub>Ag<sub>x</sub>/CdS NWs demonstrated the smallest  $R_{ct}$  value in comparison with other counterparts, indicative of its lowest interfacial charge transfer resistance.

**Table S6.** Time-resolved PL decay parameters of CdS NWs and Au<sub>1-x</sub>Ag<sub>x</sub>/CdS NWs.

| <i>Samples</i>                                 | $\tau_1$ (ns) | $\tau_2$ (ns) | $A_1$ (ns) | $A_2$ (ns) | $\tau_{aver}$ (ns) |
|------------------------------------------------|---------------|---------------|------------|------------|--------------------|
| <b>CdS NWs</b>                                 | 0.11          | 3.88          | 97.91      | 2.09       | 0.19               |
| <b>Au<sub>1-x</sub>Ag<sub>x</sub> /CdS NWs</b> | 0.08          | 9.09          | 98.05      | 1.95       | 0.25               |

## References

- (1) Millán, R.; Liu, L.; Boronat, M.; Corma, A. A new molecular pathway allows the chemoselective reduction of nitroaromatics on non-noble metal catalysts. *J. Catal.* **2018**, *364*, 19-30.
- (2) Yang, X. J.; Chen, B.; Zheng, L. Q.; Wu, L. Z.; Tung, C. H. Highly efficient and selective photocatalytic hydrogenation of functionalized nitrobenzenes. *Green Chem.* **2014**, *16* (3), 1082-1086.
- (3) Benxia, L.; Ting, G.; Tian, M.; Junxin, W.; Peng, W.; Jianfang, W.; Yu, J. C. (Gold Core)@(Ceria Shell) Nanostructures for Plasmon-Enhanced Catalytic Reactions under Visible Light. *ACS Nano* **2014**, *8*, 8152-8162.
- (4) Abad, A.; Concepción, P.; Corma, A.; García, H. A Collaborative Effect between Gold and a Support Induces the Selective Oxidation of Alcohols. *Angew. Chem., Int. Ed.* **2005**, *44* (26), 4066-4069.
- (5) Zhang, M.; Chen, C.; Ma, W.; Zhao, J. Visible-Light-Induced Aerobic Oxidation of Alcohols in a Coupled Photocatalytic System of Dye-Sensitized TiO<sub>2</sub> and TEMPO. *Angew. Chem., Int. Ed.* **2008**, *47* (50), 9730-9733.
- (6) Zhang, L. J.; Li, S.; Liu, B. K.; Wang, D. J.; Xie, T. F. Highly Efficient CdS/WO<sub>3</sub> Photocatalysts: Z-Scheme Photocatalytic Mechanism for Their Enhanced Photocatalytic H<sub>2</sub> Evolution under Visible Light. *ACS Catal.* **2014**, *4* (10), 3724-3729.
- (7) Wallar, B. J.; Lipscomb, J. D. Dioxygen Activation by Enzymes Containing Binuclear Non-Heme Iron Clusters. *Chem. Rev* **1996**, *96*, 2625-2658.
- (8) Fu, X. Y.; Li, Y. B.; Huang, M. H.; Li, T.; Dai, X. C.; Hou, S.; Wei, Z. Q.; Xiao, F. X. Partially Self-Transformed Transition-Metal Chalcogenide Interim Layer: Motivating Charge Transport Cascade for Solar Hydrogen Evolution. *Inorg. Chem.* **2020**, *59* (4), 2562-2574.
- (9) Huang, M. H.; Li, Y. B.; Li, T.; Dai, X. C.; Hou, S.; He, Y.; Xiao, G.; Xiao, F. X. Self-transformation of ultra-small gold nanoclusters to gold nanocrystals toward boosted photoreduction catalysis. *Chem. Commun.* **2019**, *55* (71), 10591-10594.
- (10) Wei, Z. Q.; Hou, S.; Lin, X.; Xu, S.; Dai, X. C.; Li, Y. H.; Li, J. Y.; Xiao, F. X.; Xu, Y. J. Unexpected Boosted Solar Water Oxidation by Nonconjugated Polymer-Mediated Tandem Charge Transfer. *J. Am. Chem. Soc.* **2020**, *142* (52), 21899-21912.
- (11) Xiao, F. X.; Hung, S. F.; Miao, J.; Wang, H. Y.; Yang, H.; Liu, B. Metal-Cluster-Decorated TiO<sub>2</sub> Nanotube Arrays: A Composite Heterostructure toward Versatile Photocatalytic and Photoelectrochemical Applications. *Small* **2014**, *11* (5), 554-567.
- (12) Xiao, F. X.; Liu, B. In situ etching-induced self-assembly of metal cluster decorated one-dimensional semiconductors for solar-powered water splitting: unraveling cooperative synergy by photoelectrochemical investigations. *Nanoscale* **2017**, *9* (43), 17118-17132.
- (13) Nikam, P. R.; Baviskar, P. K.; Sali, J. V.; Gurav, K. V.; Kim, J. H.; Sankapal, B. R. CdS surface encapsulated ZnO nanorods: Synthesis to solar cell application. *J. Alloys Compd.* **2016**, *689*, 394-400.
- (14) Yan, Z.; Yu, X.; Han, A.; Xu, P.; Du, P. Noble-Metal-Free Ni(OH)<sub>2</sub>-Modified CdS/Reduced Graphene Oxide Nanocomposite with Enhanced Photocatalytic Activity for Hydrogen Production under Visible Light Irradiation. *J. Phys. Chem. C* **2014**, *118* (40), 22896-22903.
- (15) Li, Z. Y.; Chen, Y. H.; Zhu, J. R.; Chen, Q.; Lu, S. J.; Xiao, F. X. Self-Transformation of Atomically Precise Alloy Nanoclusters to Plasmonic Alloy Nanocrystals: Evaluating Photosensitization in Solar Water Oxidation. *Inorg. Chem.* **2023**, *62* (41), 16965-16973.
- (16) Su, P.; Tang, B.; Xiao, F. X. Layer-By-Layer Assembly of Atomically Precise Alloy Nanoclusters Photosystems for Solar Water Oxidation. *Small* **2023**, *20* (7).
- (17) Pal, N. K.; Kryschi, C. A facile UV-light mediated synthesis of l-histidine stabilized silver nanocluster for efficient photodegradation of methylene blue. *J. Mol. Catal. A: Chem.* **2015**, *404-405*, 27-35.
- (18) Zheng, K. y.; Yuan, X.; Kuah, K.; Luo, Z. T.; Yao, Q. F.; Zhang, Q. B.; Xie, J. P. Boiling water synthesis

of ultrastable thiolated silver nanoclusters with aggregation-induced emission. *Chem. Commun.* **2015**, 51 (82), 15165-15168.
